# Supplementary material for: Magnetic Resonance Imaging–Guided vs Computed Tomography–Guided Stereotactic Body Radiotherapy for Prostate Cancer: The MIRAGE Randomized Clinical Trial
Source: PubMed Central journal article supplement (PMC9857817; doi:10.1001/jamaoncol.2022.6558), 2023-01-12
Supplement: jamaoncol-e226558-s002.pdf [file jamaoncol-e226558-s002.pdf]

## Supplemental Online Content

Kishan AU, Ma TM, Lamb JM, et al. Magnetic resonance imaging-guided vs computed tomography-guided stereotactic body radiotherapy for prostate cancer: the MIRAGE randomized clinical trial. *JAMA Oncol*. Published online January 12, 2023.  
doi:10.1001/jamaoncol.2022.6558

**eTable 1.** Details on Treatment Delivery Times

**eTable 2.** Comparison of Dosimetric Parameters Between CT- and MRI-Guided Arms

**eTable 3.** Sensitivity Analysis for Differences in Acute Genitourinary and Gastrointestinal Toxicity Including Patients Not Who Were Analyzed But Not Evaluable

**eTable 4.** Multivariate Analysis for Acute Grade  $\geq 2$  Genitourinary Toxicities

**eTable 5.** Differences in Grade  $\geq 2$  Genitourinary and Gastrointestinal Toxicities Stratified by Baseline International Prostate Symptom Score (IPSS)

**eTable 6.** Differences in Grade  $\geq 2$  Genitourinary and Gastrointestinal Toxicities Stratified by Baseline Prostate Volume

**eTable 7.** Acute Grade  $\geq 2$  Genitourinary and Gastrointestinal Toxicity Rates in Selected Other Stereotactic Body Radiotherapy Studies

**eFigure 1.** Longitudinal Changes in Urinary Irritative/Obstructive and Total Urinary Expanded Prostate Cancer Index Composite-26 (EPIC-26) Scores

**eFigure 2.** Proportions of Patients With Clinically Relevant Declines in Expanded Prostate Cancer Index Composite-26 (EPIC-26) Scores Urinary Subdomains

**eFigure 3.** Longitudinal Changes in Total International Prostate Symptom Score (IPSS) and IPSS Quality-of-Life Scores

**eFigure 4.** Longitudinal Changes in Sexual and Hormonal Expanded Prostate Cancer Index Composite (EPIC-26) Scores

**eFigure 5.** Proportions of Patients With Clinically Relevant Declines in Sexual and Hormonal Expanded Prostate Cancer Index Composite (EPIC-26) Scores

**eReferences**

This supplemental material has been provided by the authors to give readers additional information about their work.

**eTable 1.** Details on Treatment Delivery Times

|                                                   | CT-guidance<br>(n=77) | MRI-guidance<br>(n=79) |
|---------------------------------------------------|-----------------------|------------------------|
| Number of Arcs                                    |                       |                        |
| 2                                                 | 49 (64%)              |                        |
| 3                                                 | 1 (1%)                |                        |
| 4                                                 | 27 (35%)              |                        |
| Number of Beams (median, IQR)                     |                       | 15 (15-17)             |
| Post-Imaging Delivery Time (per fraction, second) |                       |                        |
| Median (IQR)                                      | 232 (198-272)         | 1133.4 (1009.0-1289)   |

IQR, interquartile range

**eTable 2.** Comparison of Dosimetric Parameters Between CT- and MRI-Guided Arms

| Parameter                  | CT-Guidance               | MRI-Guidance              | <i>P</i> value   |
|----------------------------|---------------------------|---------------------------|------------------|
| CTV                        |                           |                           |                  |
| Volume                     | 55.9 (44.2-66.9)          | 50.6 (37.7-60.6)          | 0.5              |
| PTV                        |                           |                           |                  |
| <b>Volume</b>              | <b>102.1 (82.5-119.6)</b> | <b>70.5 (52.6-87.3)</b>   | <b>&lt;0.001</b> |
| V <sub>40Gy</sub>          | 95% (95%-95%)             | 95% (94.1-95.0%)          | 0.37             |
| <b>V<sub>42Gy</sub></b>    | <b>5.4% (0.4-14.9%)</b>   | <b>18.6% (12.2-25.5%)</b> | <b>&lt;0.001</b> |
| Bladder                    |                           |                           |                  |
| D <sub>0.035cc</sub>       | 41.2 (40.8-41.8)          | 41.1 (40.6-41.5)          | 0.08             |
| <b>V<sub>40Gy</sub></b>    | <b>0.7 (0.2-1.6)</b>      | <b>0.3 (0.1-0.44)</b>     | <b>0.001</b>     |
| <b>V<sub>39Gy</sub></b>    | <b>3.7 (2.6-6.1)</b>      | <b>1.9 (0.9-3.6)</b>      | <b>&lt;0.001</b> |
| V <sub>20Gy</sub>          | 10.4 (7.7-17.5)           | 12.3 (5.9-18.0)           | 0.51             |
| Urethra DMax               | 41.6 (41.0-41.9)          | 41.7 (41.5-42.1)          | 0.06             |
| Rectum                     |                           |                           |                  |
| D <sub>0.035cc</sub>       | 40.0 (37.3-41.1)          | 40.4 (34.4-41.1)          | 1.0              |
| V <sub>40Gy</sub>          | 0.05 (0.0-0.8)            | 0.2 (0-0.9)               | 0.13             |
| V <sub>38Gy</sub>          | 0.5 (0.03-1.4)            | 0.8 (0.-1.6)              | 0.64             |
| V <sub>36Gy</sub>          | 1.5 (0.3-3.6)             | 2.5 (0.03-4.4)            | 0.31             |
| V <sub>32Gy</sub>          | 3.4 (1.3-6.3)             | 5.0 (0.3-7.2)             | 0.40             |
| V <sub>20Gy</sub>          | 14.1 (9.0-20.0)           | 18.2 (9.0-22.3)           | 0.33             |
| <b>Anal Canal</b>          |                           |                           |                  |
| <b>D<sub>0.035cc</sub></b> | <b>12.3 (10.2-16.4)</b>   | <b>24.0 (18.9-28.0)</b>   | <b>&lt;0.001</b> |
| <b>V<sub>20Gy</sub></b>    | <b>0.0 (0.0-0.0)</b>      | <b>0.1 (0.02-0.3)</b>     | <b>&lt;0.001</b> |
| Small Bowel                |                           |                           |                  |
| D <sub>0.035cc</sub>       | 1.7 (0.9-6.5)             | 1.4 (1.0-10.3)            | 0.91             |
| V <sub>20Gy</sub>          | 0.0 (0.0-0.0)             | 0.0 (0.0-0.0)             | 0.84             |
| Penile Bulb                |                           |                           |                  |
| V <sub>24.8Gy</sub>        | 0 (0-0)                   | 0 (0-0)                   | 0.27             |
| Mean Dose                  | 4.0 (2.6-4.9)             | 2.7 (2.3-4.5)             | 0.16             |

*P* values obtained using Wilcoxon rank-sum test

All values are reported as median Gy or cc (interquartile range).

D<sub>x cc</sub> refers to maximum dose received by x cc of structure in question; V<sub>x Gy</sub> refers to the volume of structure in question receiving x Gy

**eTable 3.** Sensitivity Analysis for Differences in Acute Genitourinary and Gastrointestinal Toxicity Including Patients Not Who Were Analyzed But Not Evaluable

|                                 | CT-guidance       | MRI-guidance       | <i>P</i> value |
|---------------------------------|-------------------|--------------------|----------------|
| Grade $\geq$ 2 Genitourinary    | 42.7% (31.6-54.7) | 25.3 % (16.2-36.4) | 0.02           |
| Grade $\geq$ 2 Gastrointestinal | 10.4% (4.6-19.5)  | 1.3% (0.03-6.7)    | 0.02           |

This “extreme” scenario assigns the patient on the MRI-guidance arm as having experienced grade 2 genitourinary and grade 2 gastrointestinal toxicity and assigns the patient on the CT-guidance arm as having experienced no toxicity. Numbers tabulated are the estimate and the 95% confidence interval.

**eTable 4.** Multivariate Analysis for Acute Grade  $\geq 2$  Genitourinary Toxicities

| <b>Parameter</b>                               | <b>OR (95% CI)</b>    | <b>P value</b> |
|------------------------------------------------|-----------------------|----------------|
| <b>Trial Arm (MRI-guidance vs CT-guidance)</b> | <b>0.4 (0.2, 0.9)</b> | <b>0.02</b>    |
| <b>Age (1-unit increase)</b>                   | <b>1.1 (1.0, 1.2)</b> | <b>0.007</b>   |
| Baseline IPSS (1-unit increase)                | 1.1 (1.0, 1.1)        | 0.1            |
| Rectal Spacer (Yes vs No)                      | 1.0 (0.5, 2.2)        | 1.0            |
| Pelvic LN Radiation (Yes vs No)                | 0.5 (0.2, 1.2)        | 0.1            |
| GTV Boost (Yes vs No)                          | 1.7 (0.7, 4.4)        | 0.3            |
| Prostate Gland Volume (1-unit increase)        | 1.0 (1.0, 1.0)        | 0.9            |
| Area under ROC curve (95% CI)                  | 0.7 (0.6, 0.8)        | n/a            |

MRI, Magnetic Resonance Imaging; CT, Computed Tomography; IPSS, International Prostate Symptom Score; LN, lymph node; GTV, gross tumor volume; OR, odds ratio; ROC, receiver operating characteristic; CI, confidence interval

**eTable 5.** Differences in Grade  $\geq 2$  Genitourinary and Gastrointestinal Toxicities Stratified by Baseline International Prostate Symptom Score (IPSS)

| <b>Endpoint</b>                  | <b>Statistic</b> | <b>CT</b>     | <b>MRI</b>    | <b>P value</b> |
|----------------------------------|------------------|---------------|---------------|----------------|
| <b>IPSS <math>\leq 15</math></b> |                  | <b>(n=63)</b> | <b>(n=68)</b> |                |
| GU Toxicity $\geq 2$             | n (%)            | 26 (41.3%)    | 17 (25.0%)    | <b>0.05</b>    |
|                                  | 95% CI           | 29.0 , 54.4   | 15.3 , 37.0   |                |
| GI Toxicity $\geq 2$             | n (%)            | 5 (7.9%)      | 0 (0.0%)      | <b>0.02</b>    |
|                                  | 95% CI           | 2.6 , 17.6    | 0 , 5.3       |                |
| <b>IPSS <math>&gt; 15</math></b> |                  | <b>(n=13)</b> | <b>(n=10)</b> |                |
| GU Toxicity $\geq 2$             | n (%)            | 7 (53.9%)     | 2 (20.0%)     | 0.2            |
|                                  | 95% CI           | 25.1 , 80.8   | 2.5 , 55.6    |                |
| GI Toxicity $\geq 2$             | n (%)            | 3 (23.1%)     | 0 (0%)        | 0.2            |
|                                  | 95% CI           | 5.04 , 53.8   | 0 , 30.9      |                |

*P* values obtained using Chi-square test and Fisher's exact test as appropriate. p-interaction  $> 0.1$

**eTable 6.** Differences in Grade  $\geq 2$  Genitourinary and Gastrointestinal Toxicities Stratified by Baseline Prostate Volume

| <b>Endpoint</b>                                | <b>Statistic</b> | <b>CT</b>     | <b>MRI</b>    | <b>P value</b> |
|------------------------------------------------|------------------|---------------|---------------|----------------|
| <b>Prostate Volume <math>\leq 50</math> cc</b> |                  | <b>(n=49)</b> | <b>(n=55)</b> |                |
| GU Toxicity $\geq 2$                           | n (%)            | 24 (48.98%)   | 12 (21.82%)   | <b>0.004</b>   |
|                                                | 95% CI           | 34.42 , 63.66 | 11.81 , 35.01 |                |
| GI Toxicity $\geq 2$                           | n (%)            | 6 (12.24%)    | 0 (0%)        | <b>0.009</b>   |
|                                                | 95% CI           | 4.63 , 24.77  | 0 , 6.49      |                |
| <b>Prostate Volume <math>&gt; 50</math> cc</b> |                  | <b>(n=27)</b> | <b>(n=23)</b> |                |
| GU Toxicity $\geq 2$                           | n (%)            | 9 (33.33%)    | 7 (30.43%)    | 1.0            |
|                                                | 95% CI           | 16.52 , 53.96 | 13.21 , 52.92 |                |
| GI Toxicity $\geq 2$                           | n (%)            | 2 (7.41%)     | 0 (0%)        | 0.5            |
|                                                | 95% CI           | 0.91 , 24.29  | 0 , 14.82     |                |

P value obtained using Chi-square test and Fisher's exact test as appropriate. p-interaction  $> 0.1$

**eTable 7.** Acute Grade  $\geq 2$  Genitourinary and Gastrointestinal Toxicity Rates in Selected Other Stereotactic Body Radiotherapy Studies

| Study                                | PTV Dose    | EQD <sub>2</sub><br>$\alpha/\beta=2$ | EQD <sub>2</sub><br>$\alpha/\beta=10$ | Margins                | Acute Grade $\geq 2$ GU<br>Toxicity | Acute Grade $\geq 2$ GI<br>Toxicity |
|--------------------------------------|-------------|--------------------------------------|---------------------------------------|------------------------|-------------------------------------|-------------------------------------|
| Jackson <i>et al.</i> <sup>1</sup>   | 7.4 Gy x 5  | 77 Gy                                | 53.7 Gy                               | 3 mm                   | 23%                                 | 4%                                  |
| Fuller <i>et al.</i> <sup>2</sup>    | 9.5 Gy x 4  | 95 Gy                                | 61.8 Gy                               | 2mm/0mm<br>posteriorly | 35.1%                               | 6.9%                                |
| Meier <i>et al.</i> <sup>3</sup>     | 7.25 Gy x 5 | 74 Gy                                | 52.1 Gy                               | 5 mm/3 mm              | 26%                                 | 8.1%                                |
| Brand <i>et al.</i> <sup>4</sup>     | 7.25 Gy x 5 | 74 Gy                                | 52.1 Gy                               | 4-5 mm/3-5mm           | 29.2%                               | 14.9%                               |
| Bruynzeel <i>et al.</i> <sup>5</sup> | 7.25 Gy x 5 | 74 Gy                                | 52.1 Gy                               | 3 mm                   | 23.8%                               | 5.0%                                |
| MIRAGE, CT-<br>Guidance              | 8 Gy x 5    | 88 Gy                                | 60 Gy                                 | 4 mm                   | 43.4%                               | 10.5%                               |
| MIRAGE, MRI-<br>Guidance             | 8 Gy x 5    | 88 Gy                                | 60 Gy                                 | 2 mm                   | 24.4%                               | 0%                                  |

EQD<sub>2</sub>, equivalent dose in 2 Gy fractions; GI, gastrointestinal; GU, genitourinary; PTV, planning target volume



**eFigure 1.** Longitudinal Changes in Urinary Irritative/Obstructive and Total Urinary Expanded Prostate Cancer Index Composite-26 (EPIC-26) Scores

*P* values determined by the Mann-Whitney test.

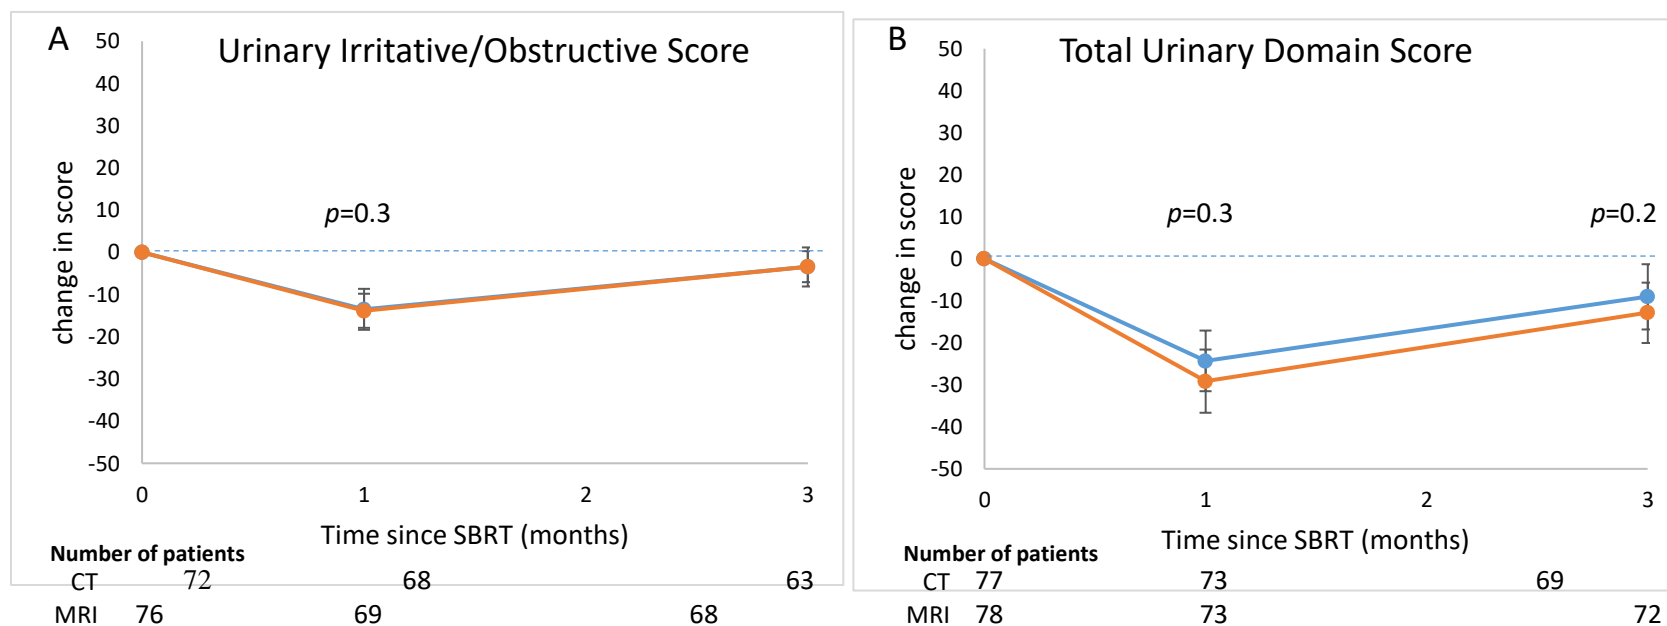

**eFigure 2.** Proportions of Patients With Clinically Relevant Declines in Expanded Prostate Cancer Index Composite-26 (EPIC-26) Scores Urinary Subdomains

Thresholds for clinically relevant declines were  $\geq 18$  points for urinary incontinence and  $\geq 14$  points for urinary irritative/obstructive subdomains. *P* values determined by chi-square test.

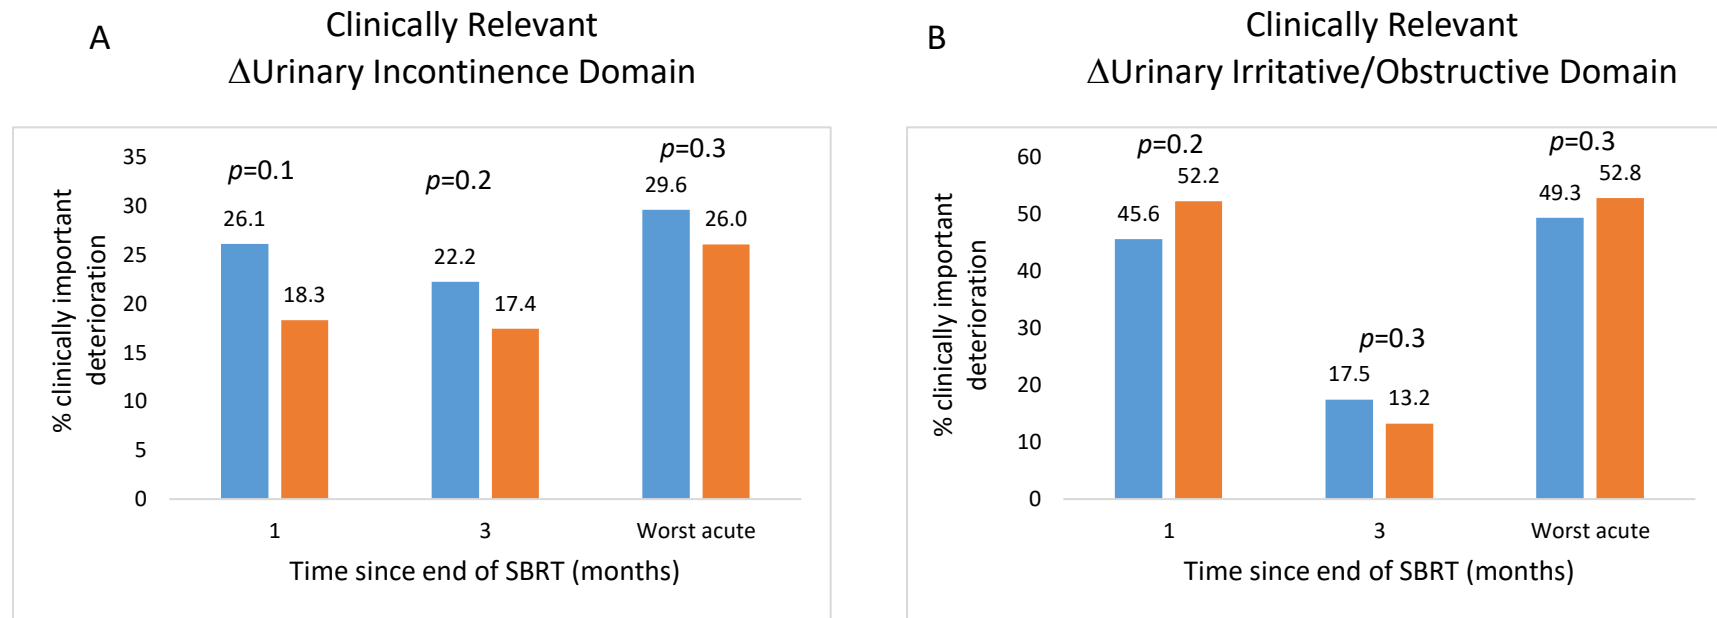

**eFigure 3.** Longitudinal Changes in Total International Prostate Symptom Score (IPSS) and IPSS Quality-of-Life Scores

*P* values determined by the Mann-Whitney test.

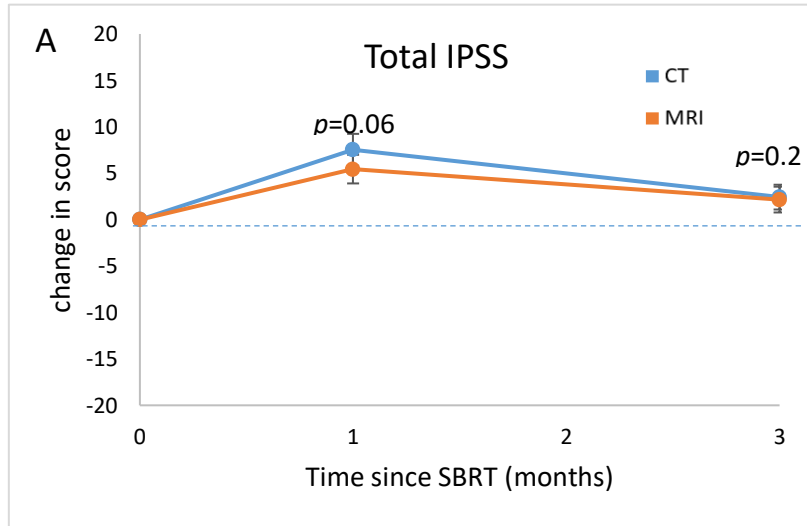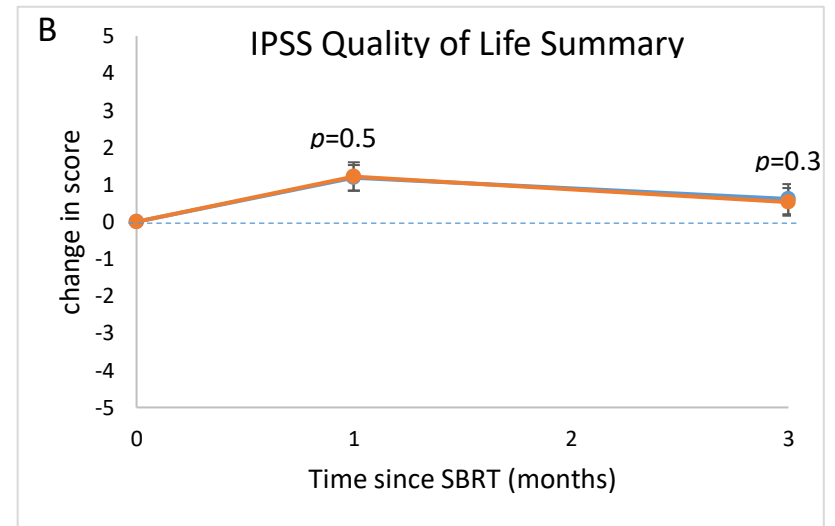

| Number of patients |    |    |    |
|--------------------|----|----|----|
| CT                 | 77 | 72 | 70 |
| MRI                | 79 | 74 | 73 |

| Number of patients |    |    |    |
|--------------------|----|----|----|
| CT                 | 77 | 70 | 69 |
| MRI                | 79 | 74 | 71 |

**eFigure 4.** Longitudinal Changes in Sexual and Hormonal Expanded Prostate Cancer Index Composite (EPIC-26) Scores

*P* values determined by the Mann-Whitney test. Analysis restricted to men not receiving androgen deprivation therapy.

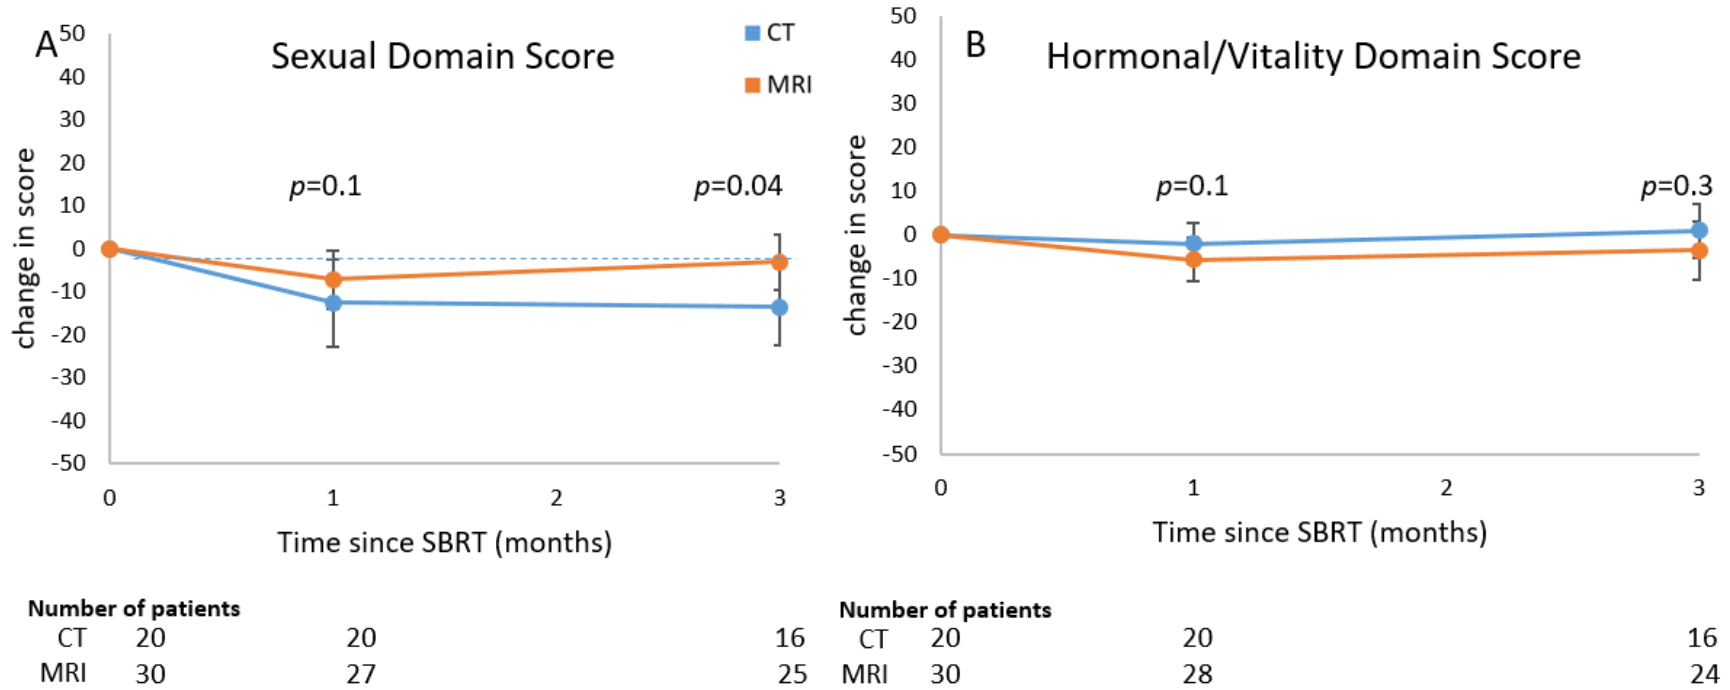

**eFigure 5.** Proportions of Patients With Clinically Relevant Declines in Sexual and Hormonal Expanded Prostate Cancer Index Composite (EPIC-26) Scores

Thresholds for clinically relevant declines were  $\geq 24$  points the sexual domain and  $\geq 12$  points for the hormonal/vitality domain score. *P* values determined by chi-square test. Analysis restricted to men not receiving androgen deprivation therapy.

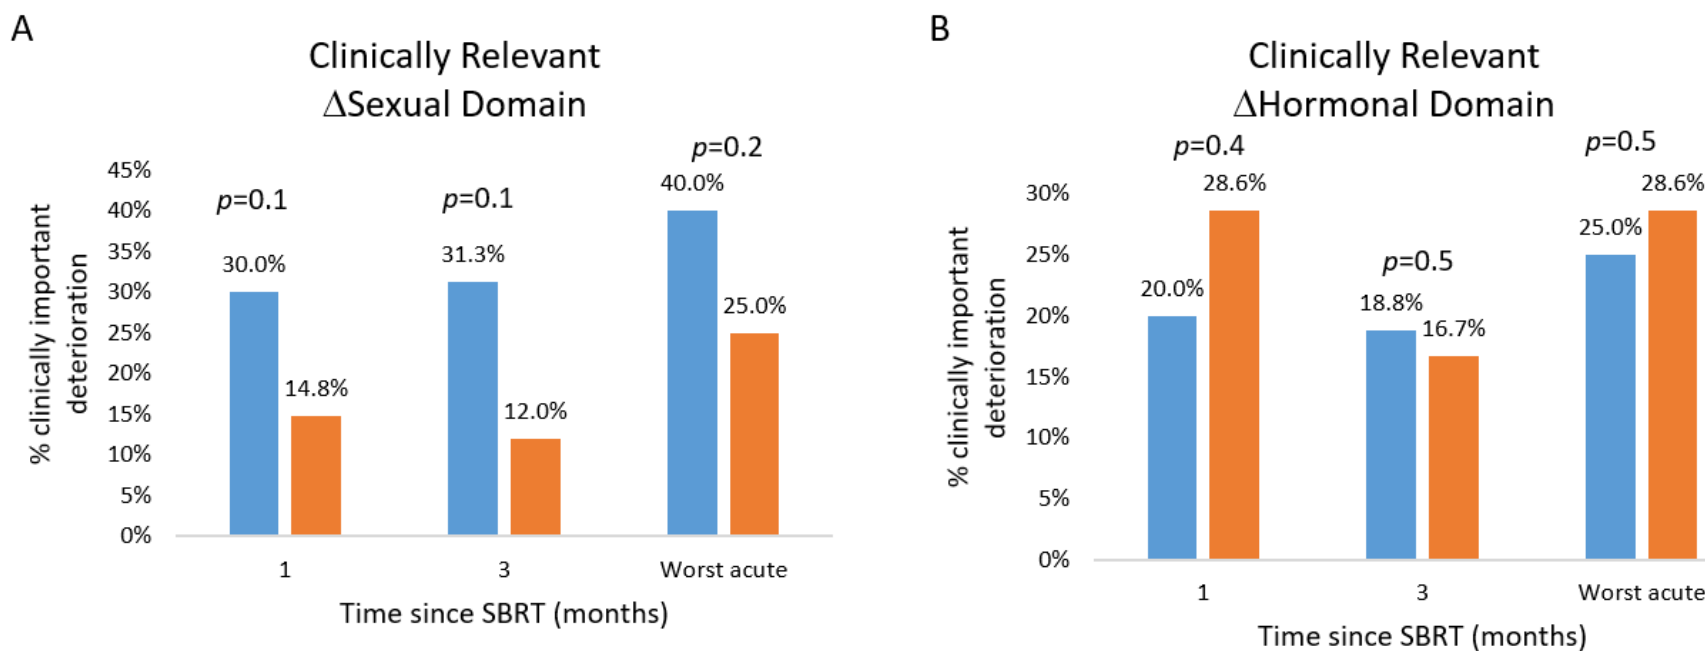

## eReferences

1. Jackson WC, Dess RT, Litzenberg DW, et al. A multi-institutional phase 2 trial of prostate stereotactic body radiation therapy (SBRT) using continuous real-time evaluation of prostate motion with patient-reported quality of life. *Pract Radiat Oncol* 2018; **8**(1): 40-7.
2. Fuller DB, Falchook AD, Crabtree T, et al. Phase 2 Multicenter Trial of Heterogeneous-dosing Stereotactic Body Radiotherapy for Low- and Intermediate-risk Prostate Cancer: 5-year Outcomes. *Eur Urol Oncol* 2018; **1**(6): 540-7.
3. Meier RM, Bloch DA, Cotruz C, et al. Multicenter Trial of Stereotactic Body Radiation Therapy for Low- and Intermediate-Risk Prostate Cancer: Survival and Toxicity Endpoints. *Int J Radiat Oncol Biol Phys* 2018; **102**(2): 296-303.
4. Brand DH, Tree AC, Ostler P, et al. Intensity-modulated fractionated radiotherapy versus stereotactic body radiotherapy for prostate cancer (PACE-B): acute toxicity findings from an international, randomised, open-label, phase 3, non-inferiority trial. *Lancet Oncol* 2019; **20**(11): 1531-43.
5. Bruynzeel AME, Tetar SU, Oei SS, et al. A Prospective Single-Arm Phase 2 Study of Stereotactic Magnetic Resonance Guided Adaptive Radiation Therapy for Prostate Cancer: Early Toxicity Results. *Int J Radiat Oncol Biol Phys* 2019; **105**(5): 1086-94.
