# Supplementary material for: Magnetic Resonance Imaging–Guided vs Computed Tomography–Guided Stereotactic Body Radiotherapy for Prostate Cancer: The MIRAGE Randomized Clinical Trial
Source: PubMed Central journal article supplement (PMC9857817; doi:10.1001/jamaoncol.2022.6558), 2023-01-12
Supplement: jamaoncol-e226558-s003.pdf [file jamaoncol-e226558-s003.pdf]

## Data Sharing Statement

Kishan. Magnetic Resonance Imaging-Guided vs Computed Tomography-Guided Stereotactic Body Radiotherapy for Prostate Cancer. *JAMA Oncol.* Published January 12, 2023.

doi:10.1001/jamaoncol.2022.6558

### Data

**Data available:** No

### Additional Information

**Explanation for why data not available:** Data from MIRAGE will not be available for data sharing until all endpoints (including the secondary endpoints related to long-term outcomes) have been analyzed.
